# Supplementary material for: Interfacial engineering enables high efficiency with a high open-circuit voltage above 1.23 V in 2D perovskite solar cells
Source: Royal Society of Chemistry journal article supplement (doi:10.1039/c8ta06925e), 2018-01-01
Supplement: c8ta06925e1.pdf [file c8ta06925e1.pdf]

## Supporting Information

### Interfacial Engineering Enables High Efficiency with High Open-circuit Voltage above 1.23 V in 2D Perovskite Solar Cells

Jiehuan Chen,<sup>a</sup> Xiaomei Lian,<sup>a</sup> Yingzhu Zhang,<sup>a</sup> Weitao Yang,<sup>a</sup> Jun Li,<sup>a</sup> Minchao Qin,<sup>b</sup> Xinhui Lu,<sup>b</sup> Gang Wu\*<sup>a</sup> and Hongzheng Chen\*<sup>a</sup>

<sup>a</sup> State Key Laboratory of Silicon Materials, MOE Key Laboratory of Macromolecular Synthesis and Functionalization, Department of Polymer Science and Engineering, Zhejiang University, Hangzhou 310027, P. R. China

\*E-mails: [wmang@zju.edu.cn](mailto:wmang@zju.edu.cn), [hzchen@zju.edu.cn](mailto:hzchen@zju.edu.cn)

<sup>b</sup> Department of Physics, The Chinese University of Hong Kong New Territories 999077, Hong Kong, P. R. China

**Key words:** 2D perovskite, high open-circuit voltage, interfacial engineering

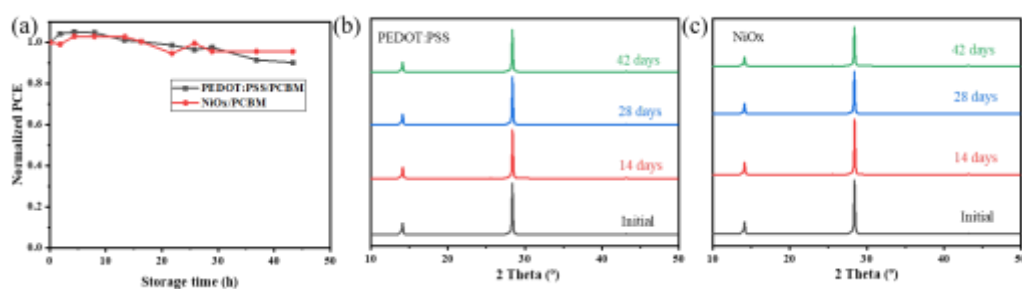

**Fig. S1** a) The device storage stability in glovebox. XRD patterns for PEDOT:PSS/perovskite film (b) and NiO<sub>x</sub>/perovskite film (c) stored in ambient air with a humidity of 60%.

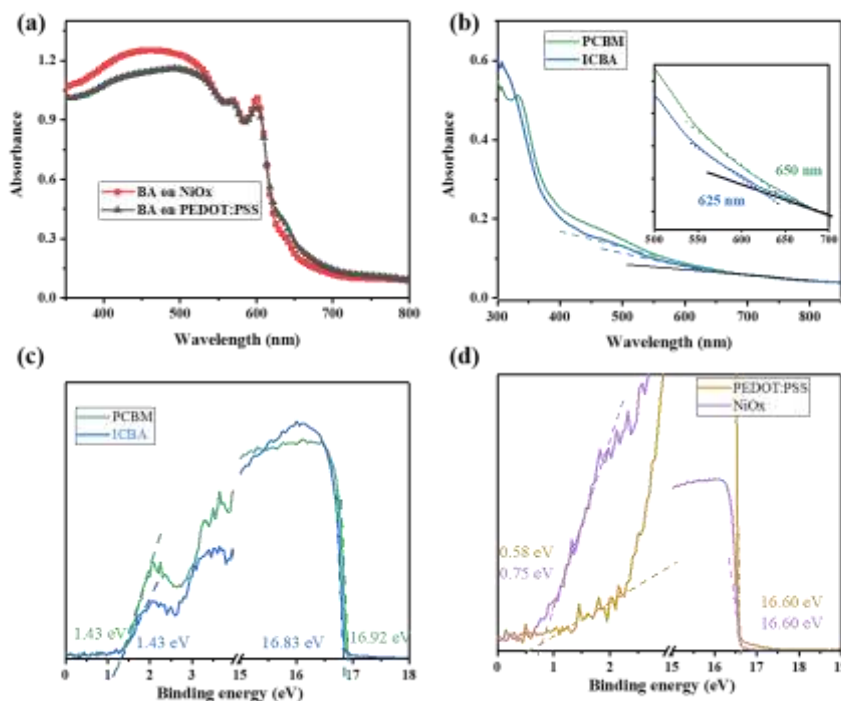

**Fig. S2** The UV-Vis absorption spectra of BA<sub>2</sub>MA<sub>2</sub>Pb<sub>3</sub>I<sub>10</sub> (a) and the bare ETLs (b), the inset inside (b) is the enlarged graph ranging from 500 nm to 700 nm. The UPS spectra for different ETLs (c) and HTLs (d).

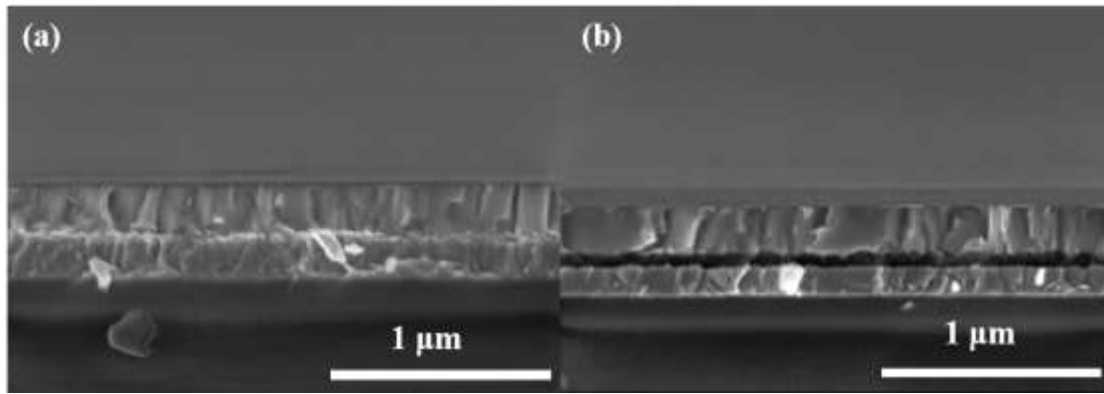

**Fig. S3** The cross-sectional SEM images of  $\text{BA}_2\text{MA}_2\text{Pb}_3\text{I}_{10}$  films deposited on  $\text{NiO}_x$  (a) and PEDOT:PSS (b).

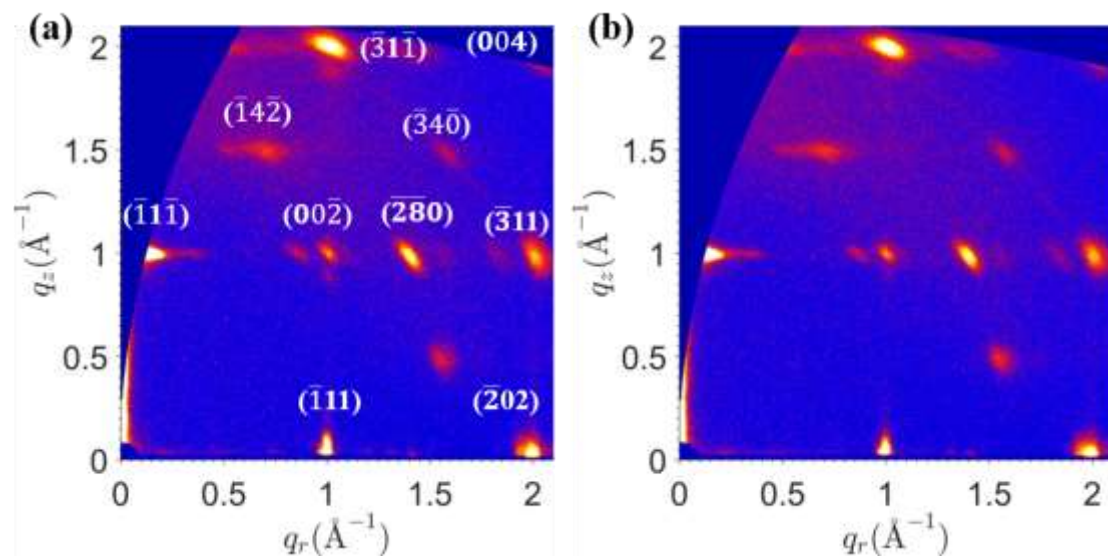

**Fig. S4** GIWAXS patterns for  $\text{BA}_2\text{MA}_2\text{Pb}_3\text{I}_{10}$  films deposited on PEDOT:PSS (a) and  $\text{NiO}_x$  (b). The unit cell parameters are  $a=8.9275 \text{ \AA}$ ,  $b=51.959 \text{ \AA}$ ,  $c=8.8777 \text{ \AA}$ , respectively.

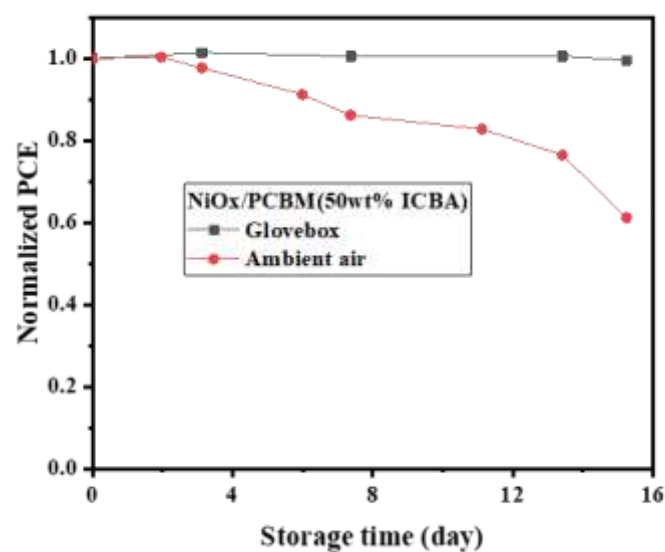

**Fig. S5** The device storage stability in glovebox and ambient air (~40% humidity, 25-30 °C) for NiO<sub>x</sub>/PCBA(50wt% ICBA).

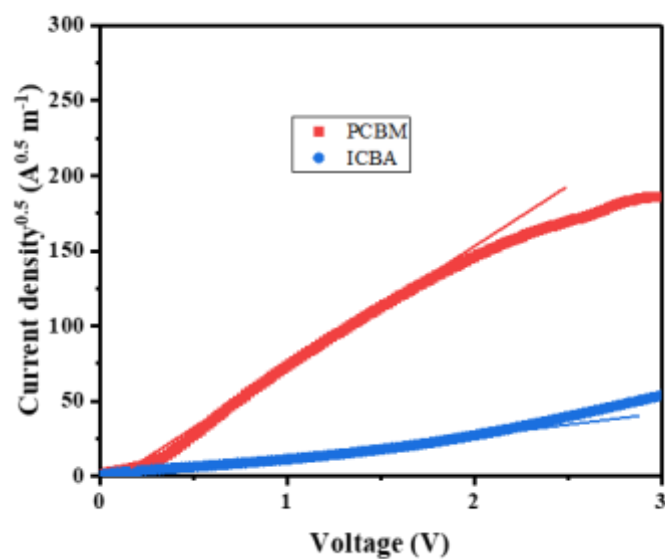

**Fig. S6** *J-V* characterization of the electron-only devices with structures of ITO/ZnO/PCBM/BCP/Ag and ITO/ZnO/ICBA/BCP/Ag. The thickness of PCBM and ICBA layers are 50 nm.

**Table S1** A summary of the high efficiency (>10%) 2D perovskite solar cells and their device structures.

| Device structure                                                                                                                                 | Voc    | PCE    | Reference                                                       |
|--------------------------------------------------------------------------------------------------------------------------------------------------|--------|--------|-----------------------------------------------------------------|
| FTO/PEDOT:PSS/ BA <sub>2</sub> MA <sub>3</sub> Pb <sub>4</sub> I <sub>13</sub><br>/PCBM/AI                                                       | 1.01 V | 12.52% | <i>Nature</i> <b>2016</b> , 536 (7616), 312-6.                  |
| ITO/PEDOT:PSS/ PEA <sub>2</sub> MA <sub>4</sub> Pb <sub>5</sub> I <sub>16</sub><br>/PCBM/BCP/Ag                                                  | 1.11 V | 11.01% | <i>Adv. Energy Mater.</i> <b>2018</b> , 10.1002/aenm.201702498  |
| ITO/PEDOT:PSS/BA <sub>2</sub> (MA <sub>0.2</sub> FA <sub>0.8</sub> ) <sub>3</sub> Pb <sub>4</sub> I <sub>13</sub><br>/PCBM/BCP/Ag                | 1.00 V | 12.82% | <i>J. Am. Chem. Soc.</i> <b>2018</b> , 140 (1), 459-465.        |
| FTO/TiO <sub>2</sub> / BA <sub>2</sub> (MA <sub>0.95</sub> CS <sub>0.05</sub> ) <sub>3</sub> Pb <sub>4</sub> I <sub>13</sub><br>/Spiro-OMeTAD/Au | 1.08 V | 13.7%  | <i>Energy Environ. Sci.</i> <b>2017</b> , 10 (10), 2095-2102.   |
| ITO/PEDOT:PSS/ BA <sub>2</sub> MA <sub>4</sub> Pb <sub>5</sub> I <sub>16</sub><br>/PCBM/AI                                                       | 1.07 V | 10.0%  | <i>Adv. Energy Mater.</i> <b>2018</b> , 8 (1), 1700979-1700988. |
| ITO/PEDOT:PSS/ PDA <sub>2</sub> MA <sub>2</sub> Pb <sub>4</sub> I <sub>13</sub><br>/C <sub>60</sub> /BCP/AI                                      | 0.98 V | 13.0%  | <i>Adv. Mater.</i> <b>2018</b> , 10.1002/adma.201800710         |
| FTO/TiO <sub>2</sub> / BA <sub>2</sub> MA <sub>3</sub> Pb <sub>4</sub> I <sub>13</sub><br>/Spiro-OMeTAD/Au                                       | 1.08 V | 12.17% | <i>Adv. Mater.</i> <b>2018</b> , 10.1002/adma.201707166         |
| FTO/C <sub>60</sub> / (iso-BA) <sub>2</sub> MA <sub>3</sub> Pb <sub>4</sub> I <sub>13</sub><br>/Spiro-OMeTAD/Au                                  | 1.20 V | 10.63% | <i>Adv. Energy Mater.</i> <b>2017</b> , 7, 1700162-170018       |

**Table S2** TRPL data of perovskite films with different mixed ETLs, fitting by the bi-exponential model.

| HTL-ETL                       | Excited side | $\tau_1$ [ns] | Frac <sub>1</sub> | $\tau_2$ [ns] | Frac <sub>2</sub> | $\tau_{ave}$ [ns] |
|-------------------------------|--------------|---------------|-------------------|---------------|-------------------|-------------------|
| NiO <sub>x</sub> -NONE        | front        | 0.853         | 0.770             | 15.118        | 0.230             | 12.855            |
| NiO <sub>x</sub> - 0wt% ICBA  | front        | 0.855         | 0.967             | 5.085         | 0.033             | 1.560             |
| NiO <sub>x</sub> -25wt% ICBA  | front        | 0.836         | 0.953             | 4.636         | 0.047             | 1.648             |
| NiO <sub>x</sub> -50wt% ICBA  | front        | 0.747         | 0.910             | 3.632         | 0.090             | 1.685             |
| NiO <sub>x</sub> -75wt% ICBA  | front        | 0.834         | 0.946             | 5.146         | 0.054             | 1.959             |
| NiO <sub>x</sub> -100wt% ICBA | front        | 0.706         | 0.842             | 6.283         | 0.158             | 4.197             |
